# Supplementary material
Source: publisher figshare collection journal article supplement (https://acs.figshare.com/ndownloader/files/20099360)

## Supplementary Information for:

A practical approach to modeling the impact of amorphous drug  
nanoparticles on the oral absorption of poorly soluble drugs

Aaron M. Stewart<sup>1\*</sup>, Michael E. Grass<sup>2</sup>

<sup>1</sup>*Global Research and Development, Lonza Pharma and Biotech, Bend, Oregon 97703, USA*

<sup>2</sup>*Dosage Form and Delivery Services, Lonza Pharma and Biotech, Bend, Oregon 97703, USA*

\*Corresponding Author

Postal address: 64550 Research Road, Bend, Oregon, USA, 97703

Phone: (541) 706-8358

Fax: (541) 382-2713

Email: [aaron.stewart@Lonza.com](mailto:aaron.stewart@Lonza.com)

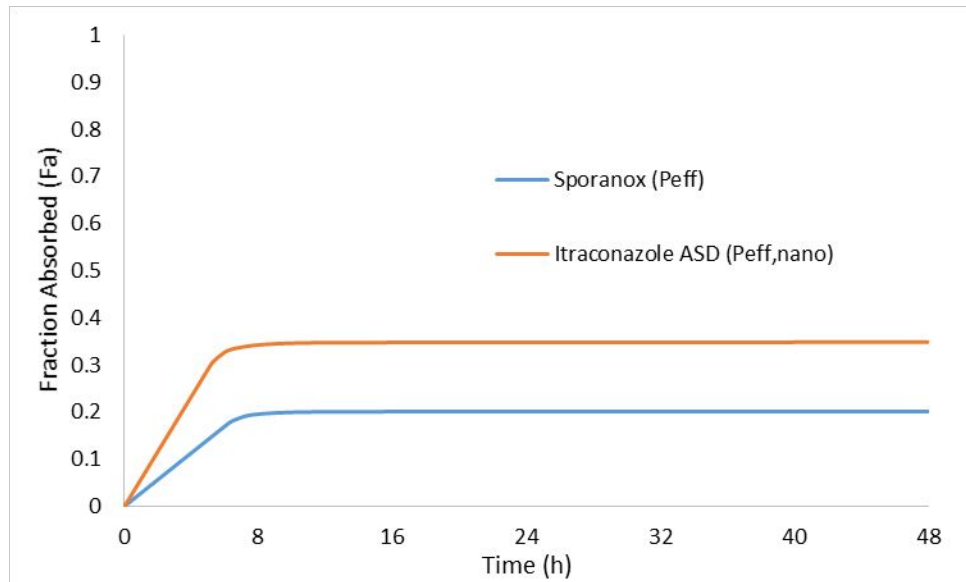

**Figure S1.** Simulated fraction dose absorbed vs. time for Sporanox (using  $P_{\text{eff}}$ ) and itraconazole ASD (using  $P_{\text{eff,nano}}$ ). Dose was 50 mg/kg to a 0.3 kg rat.

**Table S1.** Tabulated regional absorption simulations for Sporanox (using  $P_{\text{eff}}$ ) and itraconazole ASD (using  $P_{\text{eff,nano}}$ ).

| Compartment | Sporanox, $P_{\text{eff}}$ | Itraconazole ASD, $P_{\text{eff,nano}}$ |
|-------------|----------------------------|-----------------------------------------|
| Stomach     | 0.0%                       | 0.0%                                    |
| Duodenum    | 4.2%                       | 7.9%                                    |
| Jejunum 1   | 11.8%                      | 20.0%                                   |
| Jejunum 2   | 4.0%                       | 6.8%                                    |
| Ileum 1     | 0.0%                       | 0.1%                                    |
| Ileum 2     | 0.0%                       | 0.0%                                    |

|              |       |       |
|--------------|-------|-------|
| Ileum 3      | 0.0%  | 0.0%  |
| Caecum       | 0.0%  | 0.1%  |
| Asc Colon    | 0.0%  | 0.1%  |
| <i>Total</i> | 20.1% | 34.9% |

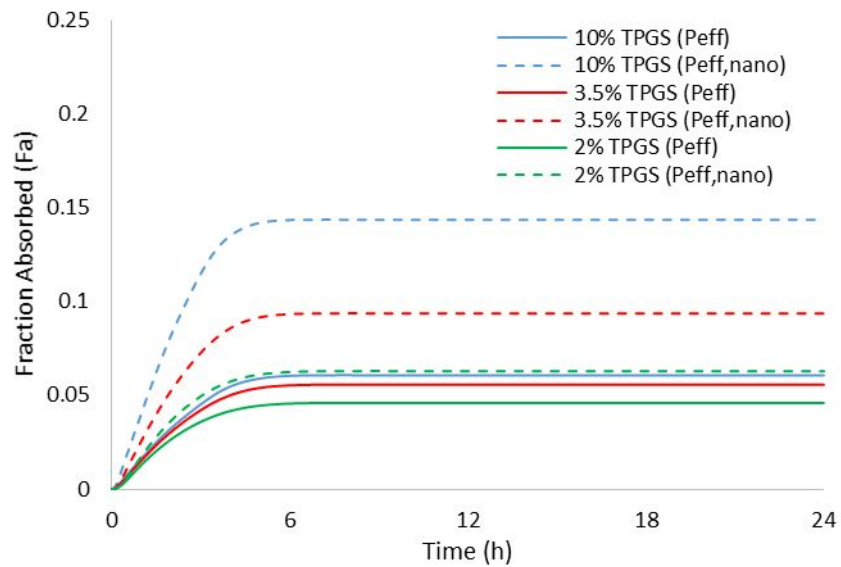

**Figure S2.** Simulated fraction dose absorbed vs. time for anacetrapib formulations comparing  $P_{\text{eff}}$  and  $P_{\text{eff,nano}}$  at a 4 mg dose to beagle dogs. Y-axis adjusted for clarity.

**Table S2.** Tabulated regional absorption simulations for anacetrapib formulations comparing  $P_{\text{eff}}$  and  $P_{\text{eff,nano}}$  at a 4 mg dose.

| Compartment         | 10% TPGS, $P_{\text{eff}}$ | 10% TPGS,<br>$P_{\text{eff,nano}}$ | 3.5% TPGS,<br>$P_{\text{eff}}$ | 3.5% TPGS,<br>$P_{\text{eff,nano}}$ | 2% TPGS,<br>$P_{\text{eff}}$ | 2% TPGS,<br>$P_{\text{eff,nano}}$ |
|---------------------|----------------------------|------------------------------------|--------------------------------|-------------------------------------|------------------------------|-----------------------------------|
| <b>Stomach</b>      | 0.0%                       | 0.0%                               | 0.0%                           | 0.0%                                | 0.0%                         | 0.0%                              |
| <b>Duodenum</b>     | 0.7%                       | 1.6%                               | 0.6%                           | 1.0%                                | 0.4%                         | 0.6%                              |
| <b>Jejunum 1</b>    | 3.7%                       | 8.8%                               | 3.4%                           | 5.7%                                | 2.7%                         | 3.8%                              |
| <b>Jejunum 2</b>    | 1.6%                       | 3.5%                               | 1.5%                           | 2.4%                                | 1.3%                         | 1.7%                              |
| <b>Ileum 1</b>      | 0.0%                       | 0.1%                               | 0.0%                           | 0.0%                                | 0.0%                         | 0.0%                              |
| <b>Ileum 2</b>      | 0.0%                       | 0.1%                               | 0.0%                           | 0.0%                                | 0.0%                         | 0.0%                              |
| <b>Ileum 3</b>      | 0.0%                       | 0.1%                               | 0.0%                           | 0.0%                                | 0.0%                         | 0.0%                              |
| <b>Caecum</b>       | 0.1%                       | 0.2%                               | 0.1%                           | 0.1%                                | 0.1%                         | 0.1%                              |
| <b>Asc Colon</b>    | 0.0%                       | 0.0%                               | 0.0%                           | 0.0%                                | 0.0%                         | 0.0%                              |
| <b><i>Total</i></b> | 6.1%                       | 14.4%                              | 5.6%                           | 9.3%                                | 4.6%                         | 6.3%                              |

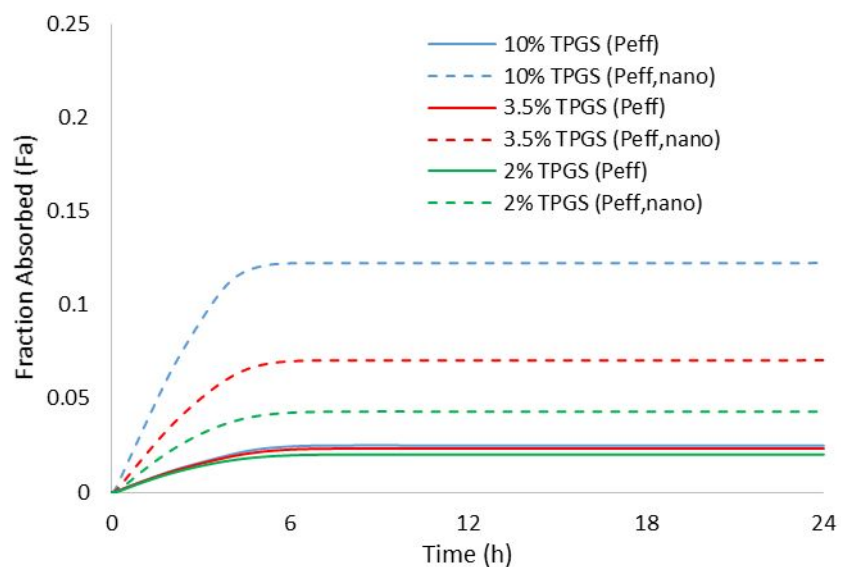

**Figure S3.** Simulated fraction dose absorbed vs. time for anacetrapib formulations comparing  $P_{\text{eff}}$  and  $P_{\text{eff,nano}}$  at a 12 mg dose to beagle dogs. Y-axis has been adjusted for clarity.

**Table S3.** Tabulated regional absorption simulations for anacetrapib formulations comparing  $P_{\text{eff}}$  and  $P_{\text{eff,nano}}$  at a 12 mg dose.

| Compartment | 10% TPGS, $P_{\text{eff}}$ | 10% TPGS, $P_{\text{eff,nano}}$ | 3.5% TPGS, $P_{\text{eff}}$ | 3.5% TPGS, $P_{\text{eff,nano}}$ | 2% TPGS, $P_{\text{eff}}$ | 2% TPGS, $P_{\text{eff,nano}}$ |
|-------------|----------------------------|---------------------------------|-----------------------------|----------------------------------|---------------------------|--------------------------------|
| Stomach     | 0.0%                       | 0.0%                            | 0.0%                        | 0.0%                             | 0.0%                      | 0.0%                           |
| Duodenum    | 0.3%                       | 1.5%                            | 0.2%                        | 0.8%                             | 0.2%                      | 0.4%                           |
| Jejunum 1   | 1.5%                       | 7.7%                            | 1.4%                        | 4.4%                             | 1.2%                      | 2.6%                           |
| Jejunum 2   | 0.6%                       | 2.8%                            | 0.6%                        | 1.7%                             | 0.5%                      | 1.1%                           |
| Ileum 1     | 0.0%                       | 0.1%                            | 0.0%                        | 0.0%                             | 0.0%                      | 0.0%                           |
| Ileum 2     | 0.0%                       | 0.1%                            | 0.0%                        | 0.0%                             | 0.0%                      | 0.0%                           |

|                  |      |       |      |      |      |      |
|------------------|------|-------|------|------|------|------|
| <b>Ileum 3</b>   | 0.0% | 0.0%  | 0.0% | 0.0% | 0.0% | 0.0% |
| <b>Caecum</b>    | 0.0% | 0.1%  | 0.0% | 0.1% | 0.0% | 0.1% |
| <b>Asc Colon</b> | 0.0% | 0.0%  | 0.0% | 0.0% | 0.0% | 0.0% |
| <b>Total</b>     | 2.5% | 12.2% | 2.3% | 7.1% | 2.0% | 4.3% |

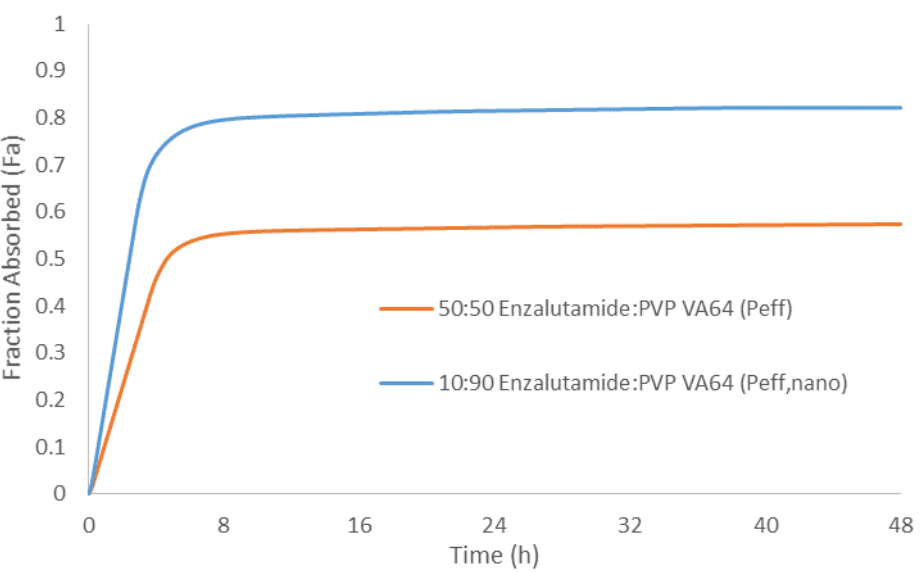

**Figure S4.** Simulated fraction dose absorbed vs. time for 50:50 enzalutamide:PVP VA64 (using  $P_{eff}$ ) and 10:90 enzalutamide:PVP VA64 ASDs (using  $P_{eff,nano}$ ). Dose was 100 mg/kg to a 0.5 kg rat.

**Table S4.** Tabulated regional absorption simulations for 50:50 enzalutamide:PVP VA64 (using  $P_{eff}$ ) and 10:90 enzalutamide:PVP VA64 ASDs (using  $P_{eff,nano}$ ).



|                                        |                       |                       |                       |                       |                       |                       |                       |                       |
|----------------------------------------|-----------------------|-----------------------|-----------------------|-----------------------|-----------------------|-----------------------|-----------------------|-----------------------|
| $C_u$ ( $\mu\text{g/mL}$ )             | 42                    | 42                    | 42                    | 42                    | 42                    | 42                    | 42                    | 42                    |
| $C_{\text{SIF}}$ ( $\mu\text{g/mL}$ )  | 680                   | 588                   | 237                   | 96                    | 44                    | 42                    | 42                    | 42                    |
| $C_{\text{nano}}$ ( $\mu\text{g/mL}$ ) | 10393                 | 9036                  | 3986                  | 2259                  | 2236                  | 2225                  | 2081                  | 1882                  |
| $d_{\text{nano}(n)}$ (nm)              | 100                   | 93                    | 71                    | 59                    | 60                    | 59                    | 58                    | 56                    |
| Fa (prior compartment)                 | 0                     | 0.184                 | 0.456                 | 0.156                 | 0.002                 | 0.001                 | 0.013                 | 0.018                 |
| $P_{\text{eff,nano}(n)}$ (cm/s)        | $1.87 \times 10^{-4}$ | $1.90 \times 10^{-4}$ | $1.93 \times 10^{-4}$ | $1.93 \times 10^{-4}$ | $2.09 \times 10^{-4}$ | $2.10 \times 10^{-4}$ | $2.05 \times 10^{-4}$ | $1.99 \times 10^{-4}$ |

**Figure S5.** Simulated blood plasma profiles comparing  $P_{\text{eff}}$ ,  $P_{\text{eff,nano}}$  and  $P_{\text{eff,nano}(n)}$  for 10:50

enzalutamide:PVP VA64. Dose was 100 mg/kg to a 0.5 kg rat.

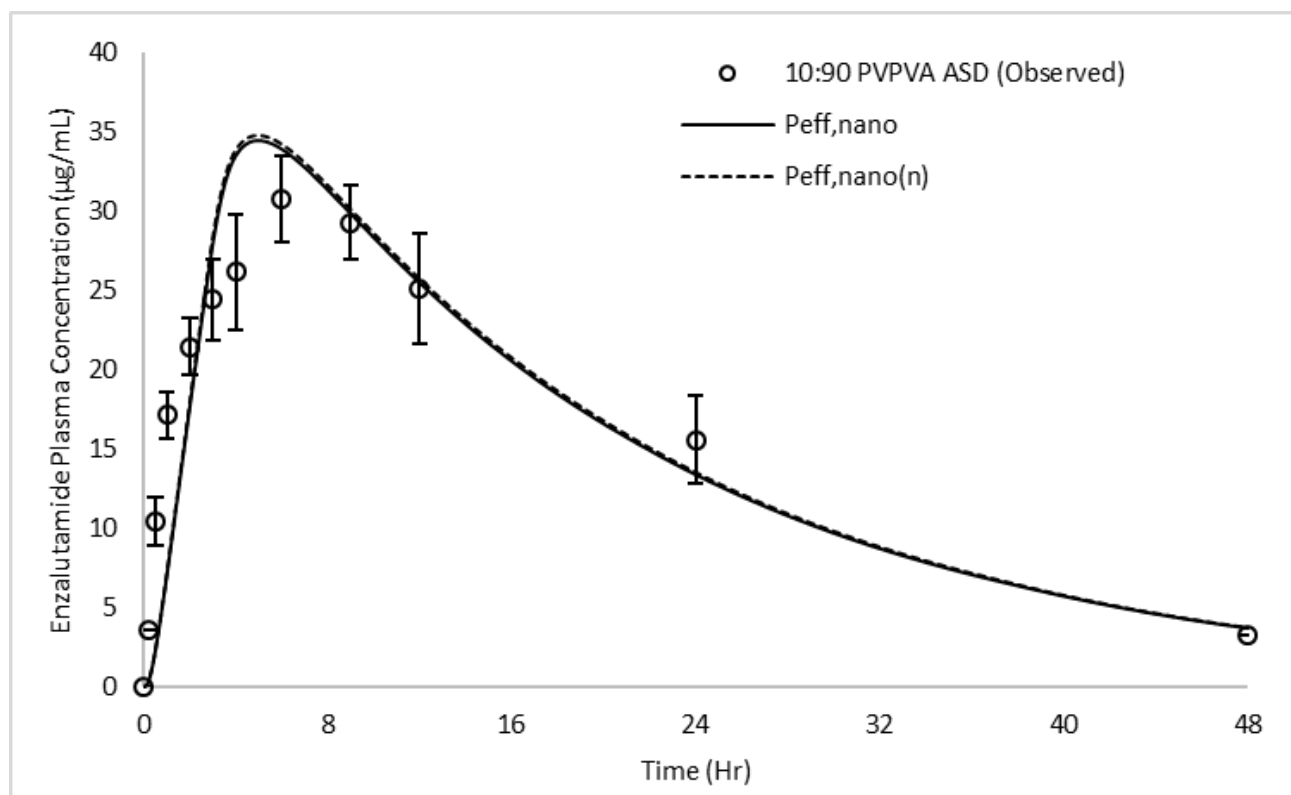

Supplement: Supplementary file 1 [file 20099360]
